# Supplementary material
Source: PubMed Central journal article supplement (PMC2758566)

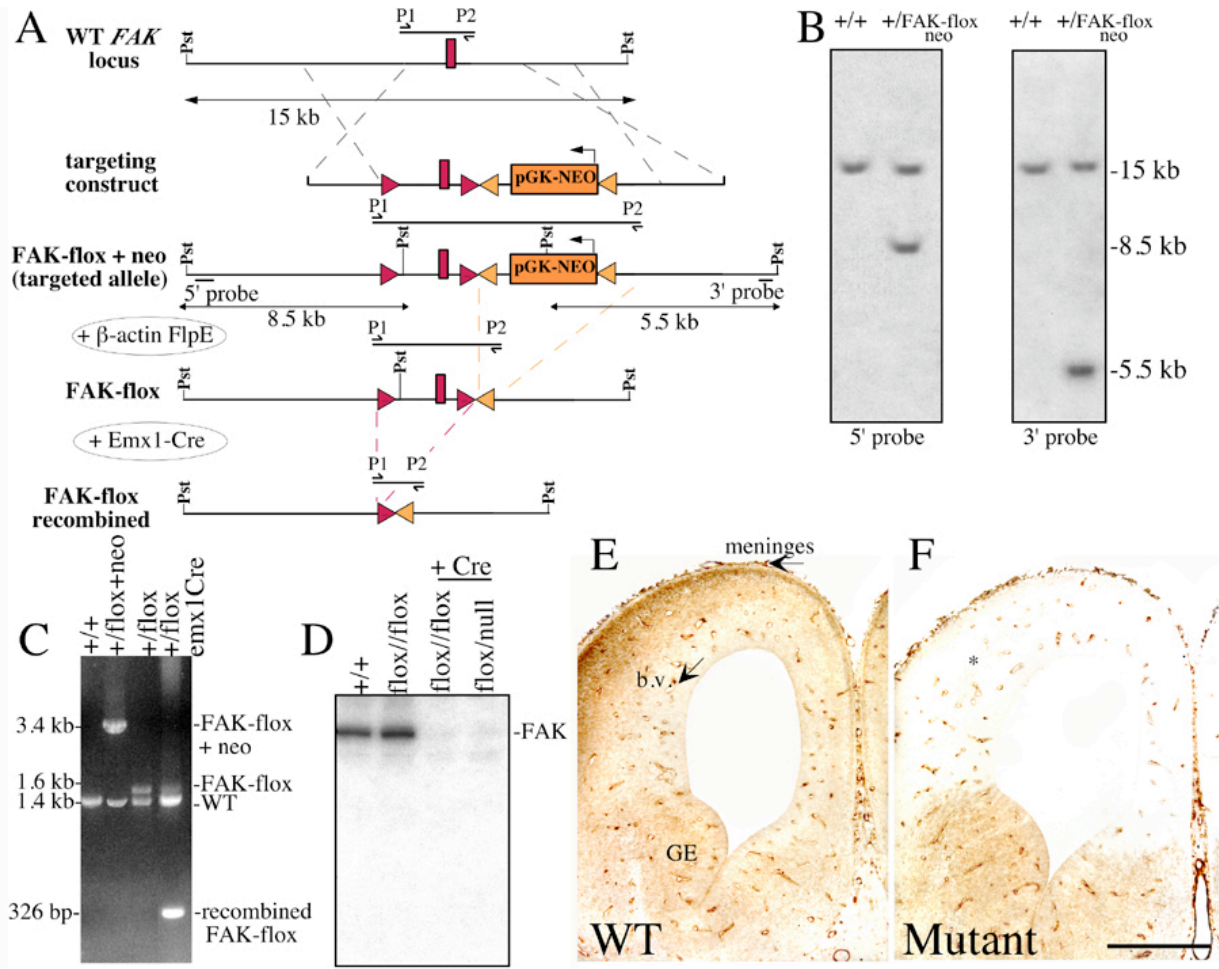

Supplement: NIHMS111847-supplement-supp.pdf [file NIHMS111847-supplement-supp.pdf]
